# Supplementary material for: The Histone Chaperone HIRA Is a Positive Regulator of Seed Germination
Source: PubMed Central journal article supplement (PMC8070706; doi:10.3390/ijms22084031), 2021-04-14
Supplement: ijms-22-04031-s001.pdf [file ijms-22-04031-s001.pdf]

## Supplementary Figures and Legends

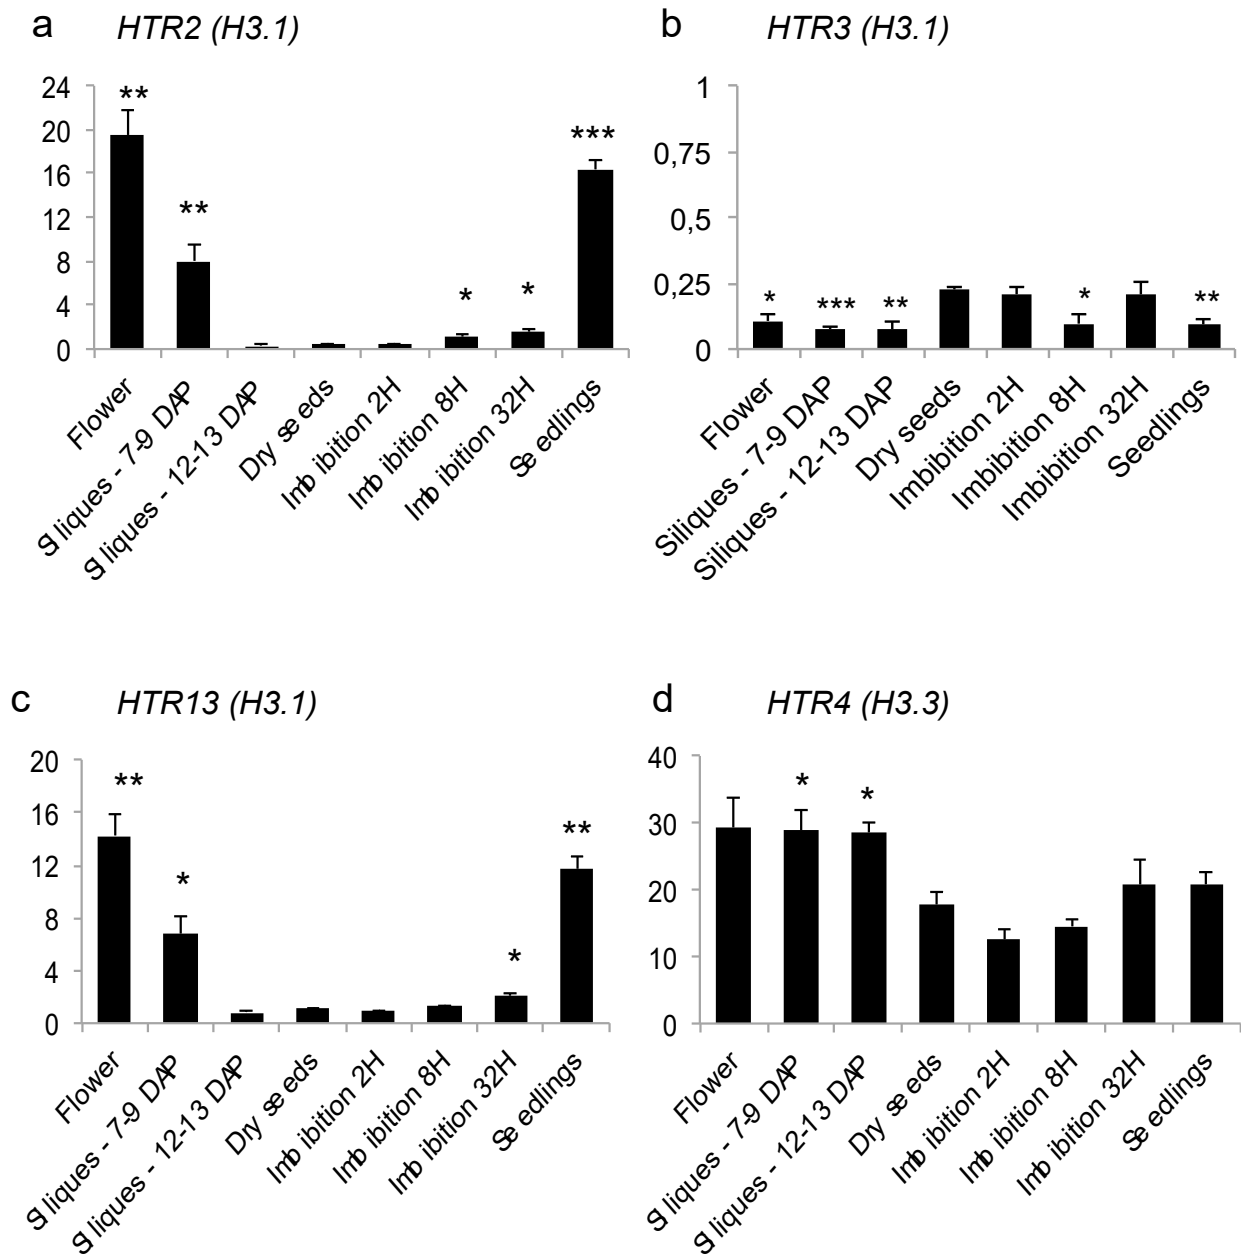

**Figure S1.** *HTR2*, *HTR3*, *HTR13* and *HTR4* expression at different developmental stages

Relative transcript levels of three genes encoding H3.1 (*HTR2* (a), *HTR3* (b) and *HTR13* (c)), as well as one gene encoding H3.3 (*HTR4* (d)) in flowers, siliques (7-9 and 12-13 days after pollination (DAP)), dry seeds and seeds imbibed for 2 hours (H), 8H or 32H as well as 2 days old seedlings. Transcript levels are normalized to *MON1* (*At2g28390*). Error bars correspond to the SEM of three biological replicates and statistical significant differences relative to dry seeds were determined using a two-sided Student t-test (\*  $p < 0,05$ ; \*\*  $p < 0,01$ ; \*\*\*  $p < 0,001$ ).

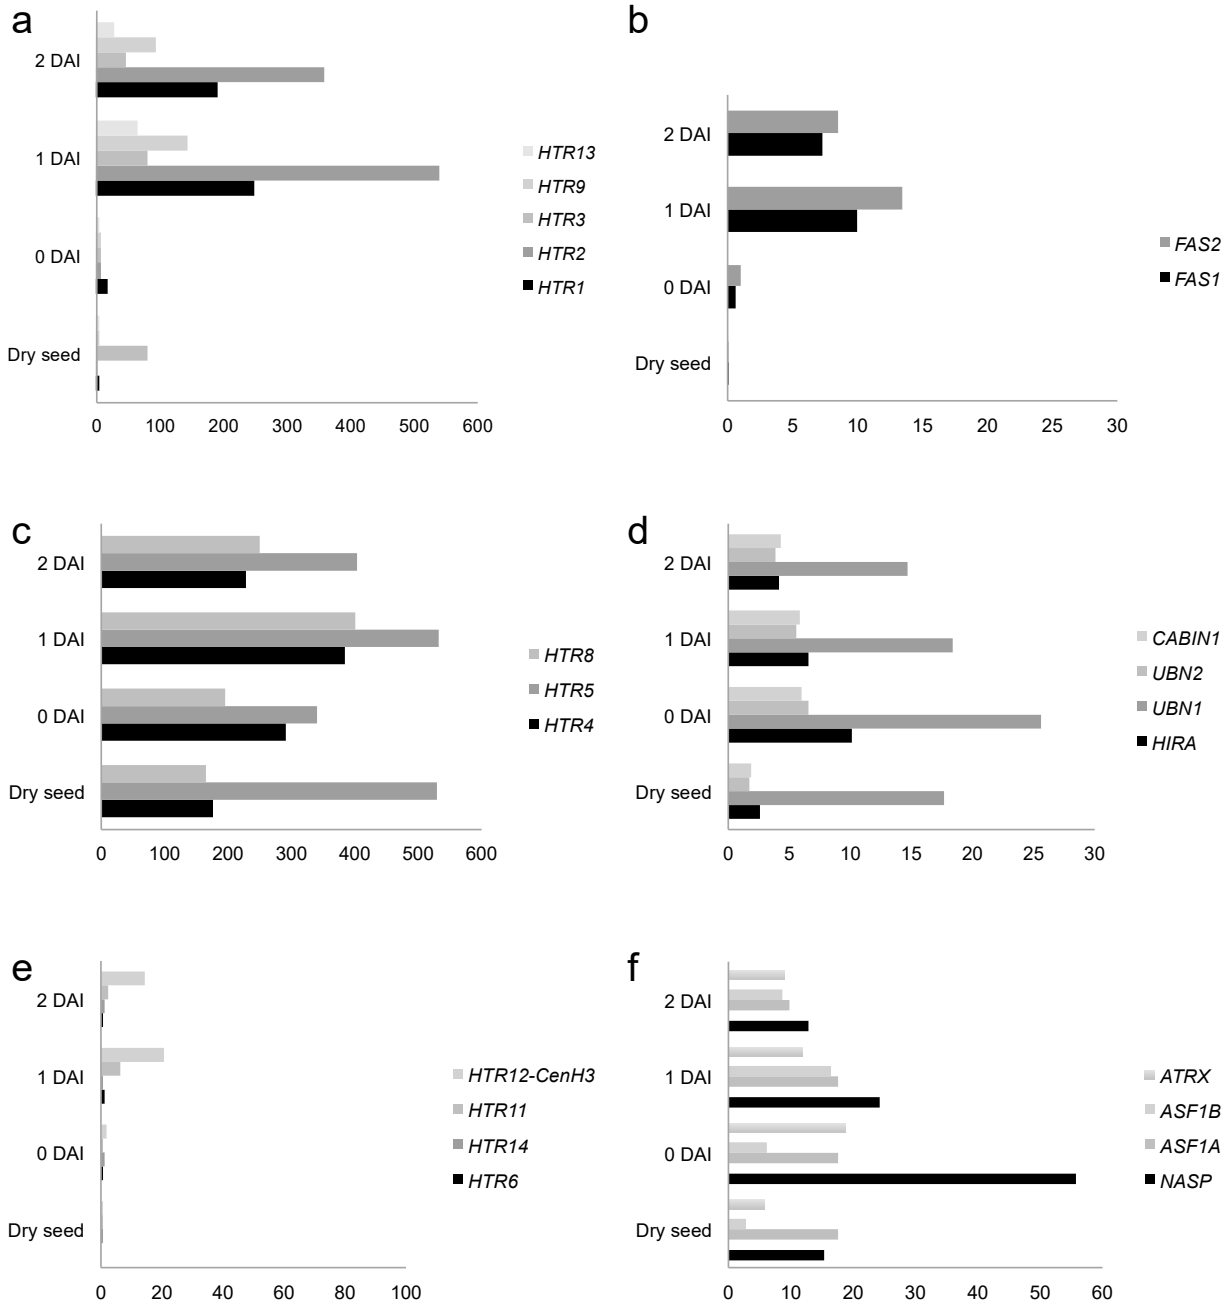

**Figure S2:** Dynamic expression of H3 histone chaperones during seed imbibition and germination

Expression in FPKM (Fragments Per Kilobase Million) of genes encoding H3 histones: replicative variants (a) *HTR1*, *HTR2*, *HTR3*, *HTR9* and *HTR13*; replacement variants (c) *HTR4*, *HTR5* and *HTR8*, the atypical variants H3.6 (*HTR6*), H3.14 (*HTR14*), H3.11 (*HTR11*) and the centromeric variant CenH3 (*HTR12*) (e) as well as genes encoding known H3 histone chaperones; including the CAF-1 complex (b), the HIRA complex (d) and genes encoding ATRX, NASP and ASF1a and b (f) in dry seeds, seeds after 4 days of stratification (0 Days after imbibition (DAI)) and after 1 or 2 days under long day conditions at 22°C (1 DAI, 2 DAI). Expression data are from [1]. *HTR10* (*H3.10*) and *H3.15* (*HTR15*) are not expressed in these tissues.

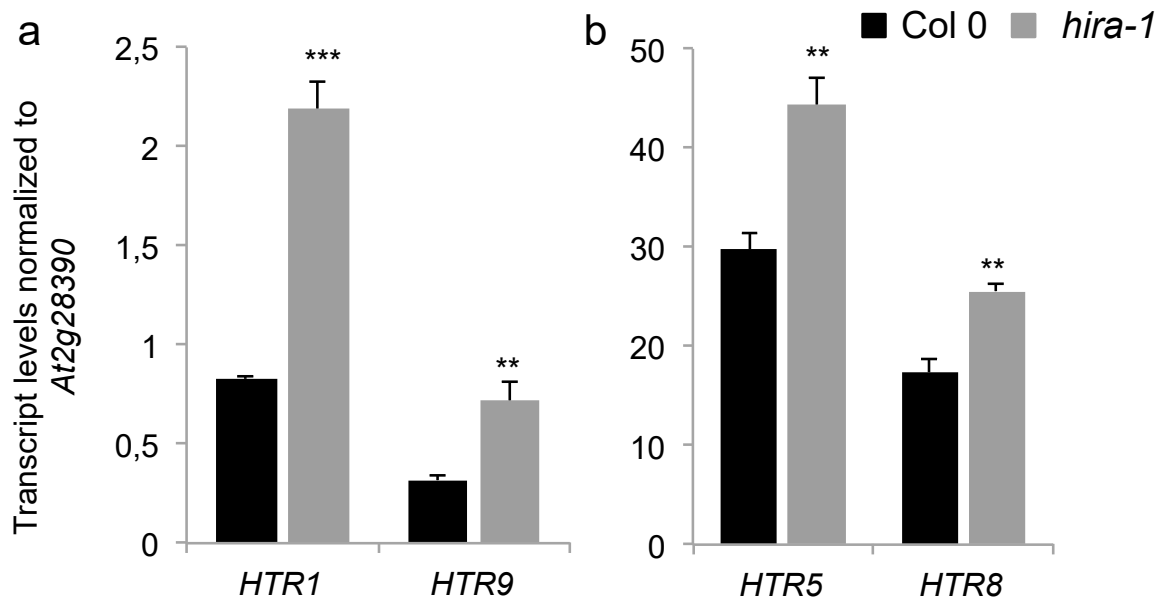

**Figure S3:** H3.1 and H3.3 expression in *hira-1* mutant seeds

Relative transcript levels of two genes encoding H3.1 (a, *HTR1*, *HTR9*) or H3.3 (b, *HTR5*, *HTR8*) in WT and *hira-1* mutant dry seeds. Error bars correspond to the SEM of four biological replicates and statistical significant differences relative to WT were determined using a two-sided Student t-test (\*\*  $p < 0,01$ ; \*\*\*  $p < 0,001$ ).

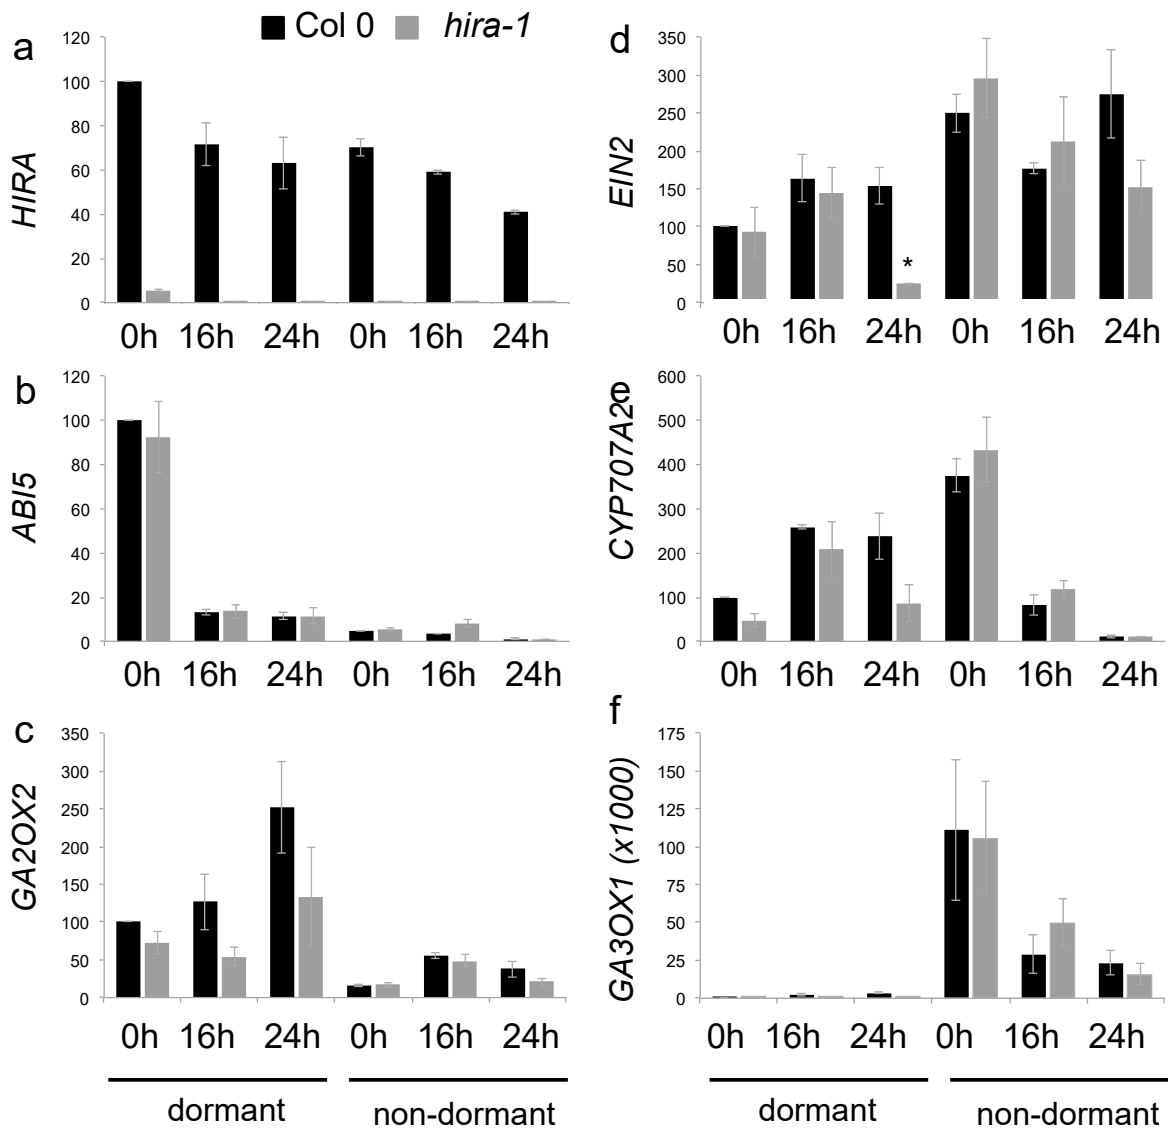

**Figure S4:** Gene expression in *hira-1* mutant seeds

Relative transcript levels of *HIRA* (a), *ABA INSENSITIVE 5 (ABI5)* (b), *GIBBERELLIN 2-OXIDASE 2 (GA2OX2)* (c), *ETHYLENE-INSENSITIVE PROTEIN2 (EIN2)* (d), *CYTOCHROME P450, FAMILY 707, SUBFAMILY A (CYP707A)* (e) and *GIBBERELLIN 3-OXIDASE 1 (GA3OX1)* (f) in dormant or non-dormant seeds (after 48 hours of imbibition) with or without incubation for 16 or 24 hours at 25°C in darkness. Error bars indicate SD for three biological replicates.

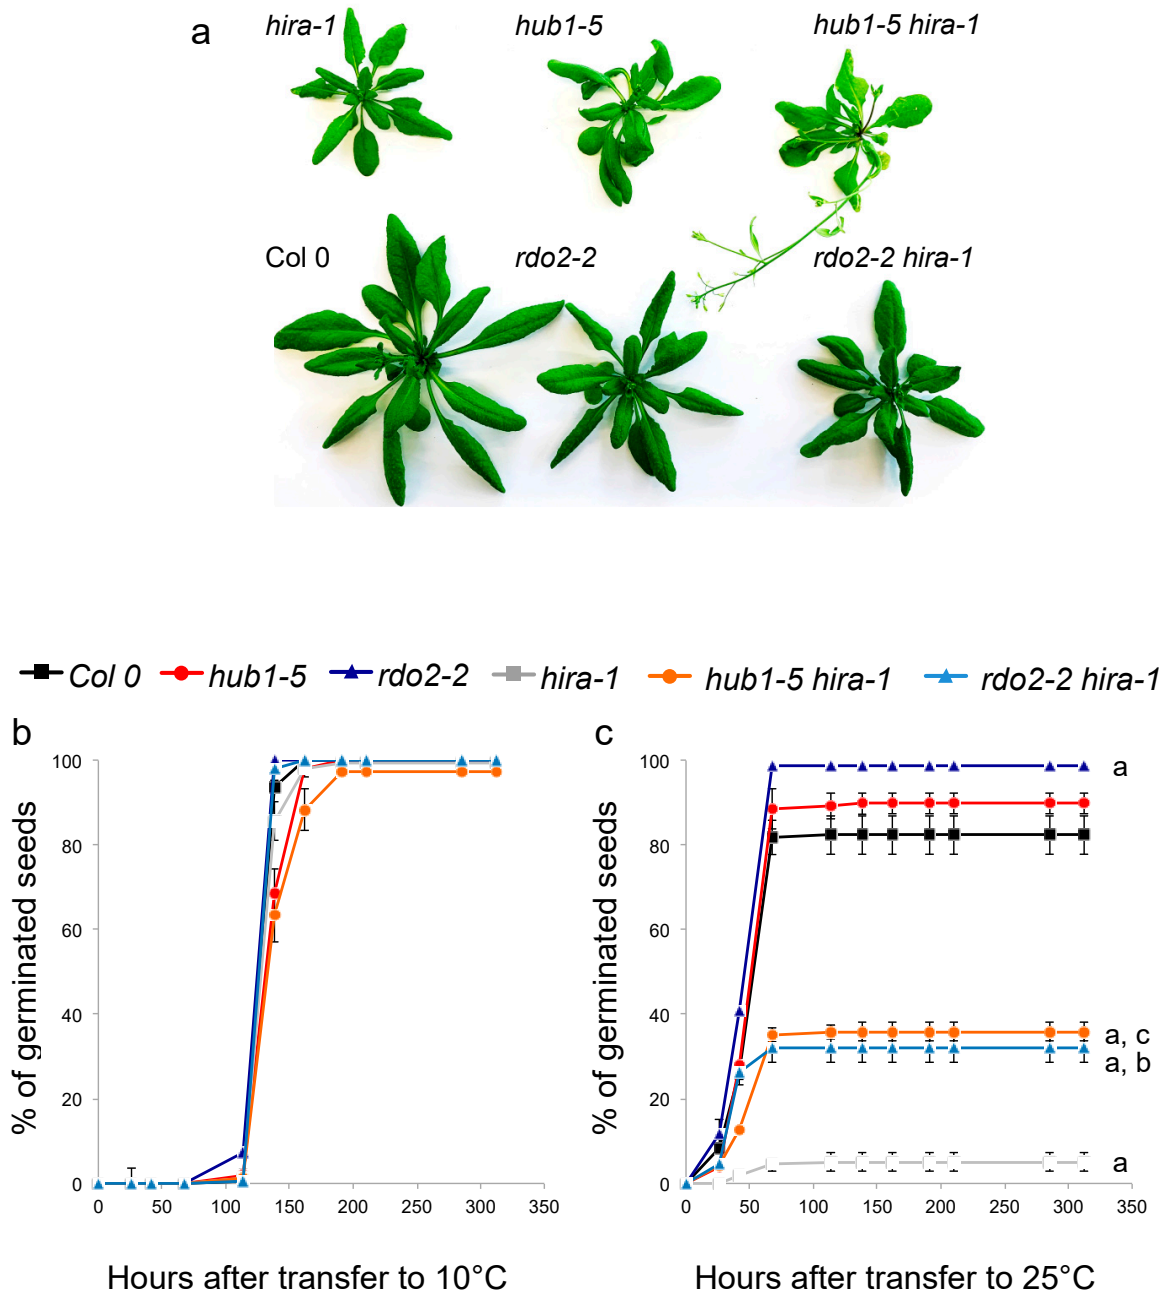

**Figure S5:** Growth and dormancy phenotypes of single and multiple *hira-1*, *hub1-5* and *rdo2-2* mutants

(a) Representative images of WT, *hira-1*, *hub1-5*, *rdo2-2*, *rdo2-2 hira-1* and *hub1-5 hira-1* mutant plants. (b-c) Same as Figure 5; data obtained with an independent seed batch. Germination of freshly harvested seeds of Col 0 (black), *hub1-5* (red), *rdo2-2* (dark blue), *hira-1* (grey), *hub1-5 hira-1* (orange) and *rdo2-2 hira-1* (light blue) at 10°C (seed viability test; a) or at 25°C (dormancy test; b) in darkness. Means of biological triplicates with SEM are shown. Statistical significant differences were determined using a two-sided Student t-test (a =  $p < 0,01$  relative to Col 0; b =  $p < 0,01$  relative to *hub1-5*; c =  $p < 0,01$  relative to *rdo2-2*).

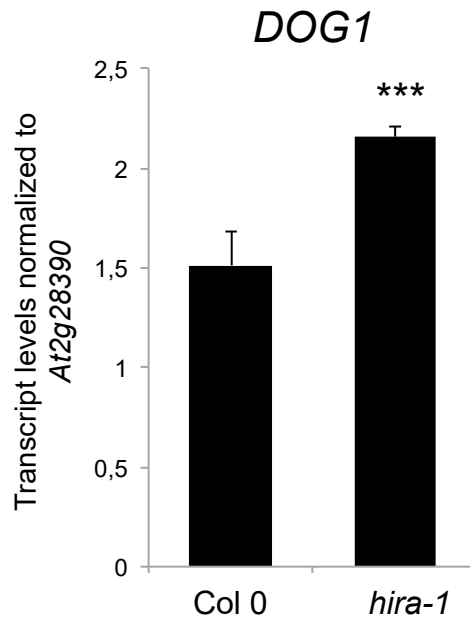

**Figure S6:** *DOG1* expression in *hira-1* mutant seeds

Relative *DOG1* transcript levels in WT and *hira-1* mutant dormant dry seeds. Error bars correspond to the SEM of four biological replicates and statistical significant differences relative to WT were determined using a two-sided Student t-test (\*\*\*)  $p < 0,001$ ).

**Table S1.** Primers used in this study.

| Gene                        | Forward and Reverse primers (5' to 3')               |
|-----------------------------|------------------------------------------------------|
| <i>MON1 (At2g28390)</i>     | AACTCTATGCAGCATTGATCCACT<br>TGATTGCATATCTTTATCGCCATC |
| <i>HTR1 (At5g65360)</i>     | AGCGATCTCACGAACCAAAC<br>GAAATCCACCGGAGGAAAAG         |
| <i>HTR2 (At1g09200)</i>     | GCAGACGGCTAGGAAATCAA<br>TTCCGGGTCTGAATCTGTGT         |
| <i>HTR3 (At3g27360)</i>     | CTGAAGTGTCTTCCAGATGT<br>ACAAGTCACTAAGACCTGAA         |
| <i>HTR4 (At4g40030)</i>     | AATAAAGATGGCTCGTACCA<br>CTTACGGATTTCACGGAGAG         |
| <i>HTR5 (At4g40040)</i>     | TTGCACTACGTGAAATTCGT<br>CACAAGGTATGCTTCAGCAG         |
| <i>HTR8 (At5g10980)</i>     | AAGAGCTAACACCGCGTGAC<br>AGGAAATCAGCACCAACCAC         |
| <i>HTR9 (At5g10400)</i>     | TAATCTCTGTGCGATTTCATGCT<br>CGAAAACGAAAAGAGACAGCTT    |
| <i>HTR13 (At5g10390)</i>    | AAGCACCAAGAAAGCAACTC<br>CTTACGGATCAGAAGCTCAG         |
| <i>CB5-E (At5g53560)</i>    | TGAAGAAGTTTCAAAGCACAAACA<br>TCATCCATGAATGGAGTCACA    |
| <i>TIP41 (At4g34270)</i>    | GTGAAAACGTGTTGGAGAGAAGCAA<br>TCAACTGGATACCCTTTCGCA   |
| <i>RHIP1 (At4g26410)</i>    | GAGCTGAAGTGGCTTCCATGAC<br>GGTCCGACATACCCATGATCC      |
| <i>HIRA (At3g44530)</i>     | AACAAGACCAGAACTCAAGA<br>CTTTAACAACGCCTAACTGAG        |
| <i>DOG1 (At5G45830)</i>     | TCTCGTCTCGACAAGTCAGC<br>ACCAAATCTGCCAAGTCCAT         |
| <i>ABI5 (At2g36270)</i>     | AACATGCATTGGCGGAGTTG<br>GCAATTCGGTTGTGCCCTT          |
| <i>GA2OX2 (At1g30040)</i>   | ATGGTGAAGGTGGGGTTTGG<br>CTCCCGTTAGTCATAACCTGAAG      |
| <i>GA3OX1 (At1g15550)</i>   | CATCACCTCAACTACTGCGATA<br>TTAGCTGGAGAGCAGCTTGG       |
| <i>CYP707A2 (At2g29090)</i> | CTCGCCAAAACAAGTACGGG<br>AGCCGCTCTGGACTACTTTA         |
| <i>EIN2 (At5g03280)</i>     | CACCACTCTGCTTGATCGTC<br>TCGTCTTCGTTCCCTCTTGT         |

## References

1. Kawakatsu, T.; Nery, J.R.; Castanon, R.; Ecker, J.R. Dynamic DNA methylation reconfiguration during seed development and germination. *Genome Biol.* **2017**, *18*, 171, doi:10.1186/s13059-017-1251-x.
